# Supplementary material for: Role of Damage DNA-Binding Protein 1 in Pancreatic Cancer Progression and Chemoresistance
Source: PubMed Central journal article supplement (PMC6966444; doi:10.3390/cancers11121998), 2019-12-12
Supplement: cancers-11-01998-s001.pdf [file cancers-11-01998-s001.pdf]

**Supplementary materials:**
**Table S1.** The IC<sub>50</sub> values for GEM in PDAC cells.

| Cell lines          | IC <sub>50</sub> | Cell lines       | IC <sub>50</sub> |
|---------------------|------------------|------------------|------------------|
| MiaPaCa-2-scrambled | 1.853±0.103 μM   | PANC-1-scrambled | 10.338±0.830 μM  |
| MiaPaCa-2-shDDB1-A  | 0.403±0.024 μM   | PANC-1-shDDB1-A  | 2.831±0.312 μM   |
| MiaPaCa-2-shDDB1-B  | 0.366±0.048 μM   | PANC-1-shDDB1-B  | 3.379±0.194 μM   |

**Table S2.** Primer sequences used in the study.

| Gene Name | Direction | Primer Sequence (5'-3')   |
|-----------|-----------|---------------------------|
| DDB1      | Forward   | TGCGGTCTGACCCTAATCGT      |
|           | Reverse   | GACCAACCTCACCGATGCTG      |
| dCK       | Forward   | CAAGACTGGCATGACTGGATGAA   |
|           | Reverse   | GGCACCTCTTGAAGATAATCGAAG  |
| SNAI1     | Forward   | CCTTCTCTAGGCCCTGGCTGCTAC  |
|           | Reverse   | GACATCTGAGTGGGTCTGGAGGTGG |
| ZEB1      | Forward   | GCATACAGAACCCAACTTGAACG   |
|           | Reverse   | TGGGCATTCATATGGCTTCTCTCC  |
| VIMENTIN  | Forward   | CCCTTGACATTGAGATTGCCACCT  |
|           | Reverse   | GTGGGTATCAACCAGAGGGAGTGA  |
| β-actin   | Forward   | AGAGCTACGAGCTGCCTGAC      |
|           | Reverse   | AGCACTGTGTTGGCGTACAG      |

1

**Table S3.** Intensity ratio of Western blotting in Figure 2A, 2B, 2I and 4F.

| <b>Fig 2A</b>                     | PANC-1    | Capan-1  | BXPC-3   | CFPAC-1  | MiaPaCa-2 | SW1990   | HPDE |
|-----------------------------------|-----------|----------|----------|----------|-----------|----------|------|
| Intensity ratio of DDB1           | 4.00      | 3.62     | 3.54     | 2.20     | 4.63      | 1.28     | 1.00 |
| Intensity ratio of $\beta$ -actin | 1.10      | 1.08     | 1.07     | 1.00     | 0.99      | 0.92     | 1.00 |
| <b>Fig 2B</b>                     | MiaPaCa-2 |          |          | PANC-1   |           |          |      |
|                                   | Scramble  | shDDB1-A | shDDB1-B | Scramble | shDDB1-A  | shDDB1-B |      |
| Intensity ratio of DDB1           | 1.00      | 0.32     | 0.36     | 1.00     | 0.26      | 0.32     |      |
| Intensity ratio of $\beta$ -actin | 1.00      | 0.94     | 0.96     | 1.00     | 1.00      | 0.93     |      |
| <b>Fig 2I</b>                     | MiaPaCa-2 |          |          | PANC-1   |           |          |      |
|                                   | Scramble  | shDDB1-A | shDDB1-B | Scramble | shDDB1-A  | shDDB1-B |      |
| Intensity ratio of ZEB1           | 1.00      | 0.40     | 0.10     | 1.00     | 0.15      | 0.26     |      |
| Intensity ratio of VIMENTIN       | 1.00      | 0.40     | 0.25     | 1.00     | 0.43      | 0.49     |      |
| Intensity ratio of SNAI1          | 1.00      | 0.11     | 0.18     | 1.00     | 0.21      | 0.09     |      |
| Intensity ratio of $\beta$ -actin | 1.00      | 1.01     | 1.08     | 1.00     | 0.92      | 0.99     |      |
| <b>Fig 4F</b>                     | MiaPaCa-2 |          |          | PANC-1   |           |          |      |
|                                   | Scramble  | shDDB1-A | shDDB1-B | Scramble | shDDB1-A  | shDDB1-B |      |
| Intensity ratio of dCK            | 1.00      | 2.02     | 1.76     | 1.00     | 1.65      | 1.59     |      |
| Intensity ratio of $\beta$ -actin | 1.00      | 0.97     | 0.89     | 1.00     | 0.86      | 0.98     |      |

2

Figure S1. Western blotting data.

**Fig. 2A**

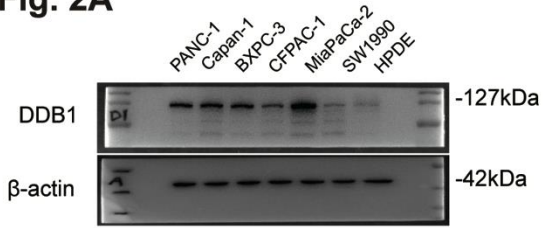

**Fig. 2B**

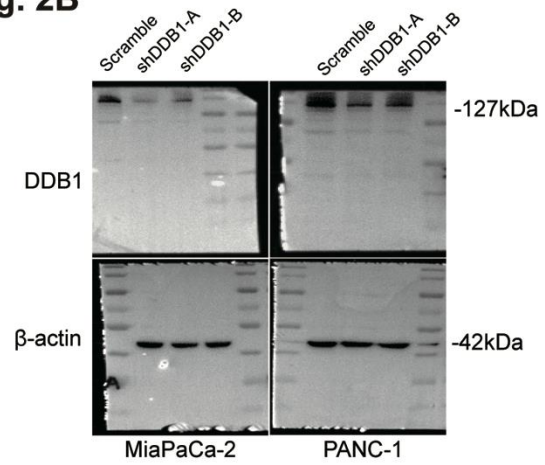

**Fig. 2I**

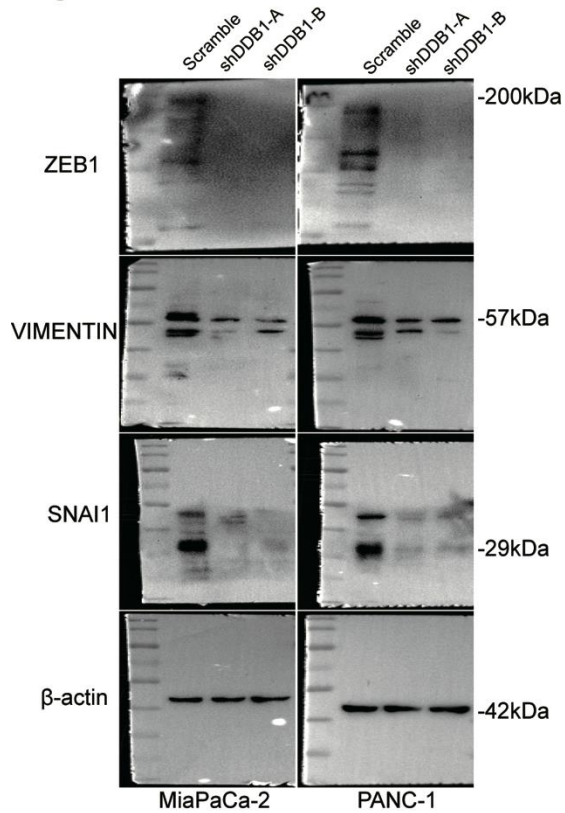

**Fig. 4F**

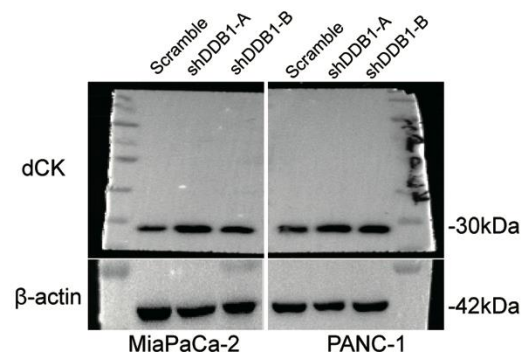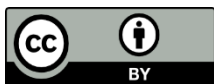

© 2019 by the authors. Submitted for possible open access publication under the terms and conditions of the Creative Commons Attribution (CC BY) license (<http://creativecommons.org/licenses/by/4.0/>).
